# Supplementary material
Source: MDPI journal article supplement (https://www.mdpi.com/2073-445X/11/3/322)
Supplement: s1 [file s1]

# Supplementary Materials:

**Table S1.** Confusion matrix for the land cover maps.

## Tokma 2013-2014

| Land cover classes                     | 1    | 2    | 3    | 4                        | 5    | 6    | 7  | User's accuracy |
|----------------------------------------|------|------|------|--------------------------|------|------|----|-----------------|
| 1.Forest                               | 387  | 1    | 0    | 0                        | 0    | 1    | 0  | 0.99            |
| 2.Woodland                             | 0    | 16   | 0    | 0                        | 0    | 0    | 0  | 1.00            |
| 3.Peatlands                            | 1    | 0    | 145  | 0                        | 0    | 0    | 0  | 0.99            |
| 4.Anthropogenic landscape              | 0    | 0    | 0    | 42                       | 0    | 0    | 0  | 1.00            |
| 5.Burnt areas                          | 0    | 0    | 0    | 0                        | 113  | 0    | 0  | 1.00            |
| 6.Other                                | 6    | 2    | 0    | 0                        | 1    | 73   | 0  | 0.89            |
| 7.Water                                | 0    | 0    | 0    | 0                        | 0    | 0    | 22 | 1.00            |
| Producer's accuracy                    | 0.98 | 0.84 | 1.00 | 1.00                     | 0.99 | 0.99 | 1  |                 |
| Overall classification accuracy = 0.98 |      |      |      | Kappa coefficient = 0.97 |      |      |    |                 |

## Tokma 2019-2020

| Land cover classes                     | 1    | 2    | 3    | 4                        | 5    | 6    | 7  | User's accuracy |
|----------------------------------------|------|------|------|--------------------------|------|------|----|-----------------|
| 1.Forest                               | 493  | 0    | 0    | 5                        | 0    | 1    | 0  | 0.99            |
| 2.Woodland                             | 0    | 22   | 0    | 0                        | 2    | 2    | 0  | 0.85            |
| 3.Peatlands                            | 0    | 2    | 174  | 0                        | 5    | 3    | 0  | 0.95            |
| 4.Anthropogenic landscape              | 19   | 0    | 0    | 142                      | 3    | 1    | 0  | 0.86            |
| 5.Burnt areas                          | 0    | 0    | 3    | 3                        | 354  | 3    | 0  | 0.98            |
| 6.Other                                | 3    | 0    | 3    | 2                        | 6    | 198  | 0  | 0.93            |
| 7.Water                                | 0    | 1    | 0    | 0                        | 2    | 0    | 31 | 0.91            |
| Producer's accuracy                    | 0.96 | 0.88 | 0.97 | 0.93                     | 0.95 | 0.95 | 1  |                 |
| Overall classification accuracy = 0.95 |      |      |      | Kappa coefficient = 0.94 |      |      |    |                 |

## Khanda 2013-2014

| Land cover classes                     | 1    | 2    | 3    | 4    | 5    | 6    | 7                        | User's accuracy |
|----------------------------------------|------|------|------|------|------|------|--------------------------|-----------------|
| 1.Forest                               | 715  | 3    | 0    | 0    | 0    | 2    | 0                        | 0.99            |
| 2.Woodland                             | 2    | 246  | 14   | 0    | 0    | 6    | 0                        | 0.92            |
| 3.Peatlands                            | 0    | 10   | 407  | 0    | 0    | 4    | 0                        | 0.97            |
| 4.Anthropogenic landscape              | 5    | 1    | 0    | 59   | 0    | 8    | 0                        | 0.81            |
| 5.Burnt areas                          | 2    | 0    | 3    | 0    | 107  | 0    | 0                        | 0.96            |
| 6.Other                                | 3    | 9    | 7    | 5    | 2    | 343  | 0                        | 0.93            |
| 7.Water                                | 0    | 2    | 0    | 0    | 0    | 0    | 468                      | 1.00            |
| Producer's accuracy                    | 0.98 | 0.91 | 0.94 | 0.92 | 0.98 | 0.94 | 1                        |                 |
| Overall classification accuracy = 0.96 |      |      |      |      |      |      | Kappa coefficient = 0.95 |                 |

## Khanda 2019-2020

| Land cover classes                     | 1    | 2    | 3    | 4    | 5    | 6    | 7                        | User's accuracy |
|----------------------------------------|------|------|------|------|------|------|--------------------------|-----------------|
| 1.Forest                               | 666  | 1    | 2    | 0    | 0    | 0    | 0                        | 1.00            |
| 2.Woodland                             | 3    | 177  | 8    | 0    | 0    | 3    | 0                        | 0.93            |
| 3.Peatlands                            | 1    | 6    | 358  | 0    | 0    | 2    | 0                        | 0.98            |
| 4.Anthropogenic landscape              | 5    | 2    | 0    | 59   | 0    | 11   | 0                        | 0.77            |
| 5.Burnt areas                          | 0    | 0    | 0    | 0    | 310  | 4    | 0                        | 0.99            |
| 6.Other                                | 0    | 1    | 2    | 0    | 10   | 373  | 0                        | 0.97            |
| 7.Water                                | 0    | 0    | 0    | 0    | 0    | 0    | 452                      | 1.00            |
| Producer's accuracy                    | 0.99 | 0.95 | 0.97 | 1.00 | 0.97 | 0.95 | 1                        |                 |
| Overall classification accuracy = 0.97 |      |      |      |      |      |      | Kappa coefficient = 0.96 |                 |
